# Supplementary material
Source: publisher figshare collection journal article supplement (https://acs.figshare.com/ndownloader/files/21989439)
Supplement: Supplementary file 1 [file 21989439]

# Supporting Information

## Janus Colloidal Dimer by Intramolecular Cross-linking in Concentrated Solutions

*Fengzheng Lang<sup>†§</sup>, Dao Xiang<sup>†§</sup>, Jiawei Wang<sup>†§</sup>, Liping Yang<sup>†§</sup>, Yan Qiao<sup>†</sup>, Zhenzhong Yang<sup>\*‡</sup>*

<sup>†</sup> State Key Laboratory of Polymer Physics and Chemistry, Institute of Chemistry, Chinese Academy of Sciences, Beijing 100190, China

<sup>‡</sup> Institute of Polymer Science & Engineering, Department of Chemical Engineering, Tsinghua University, Beijing 100084, China

<sup>§</sup> University of Chinese Academy of Sciences, Beijing 100049, China

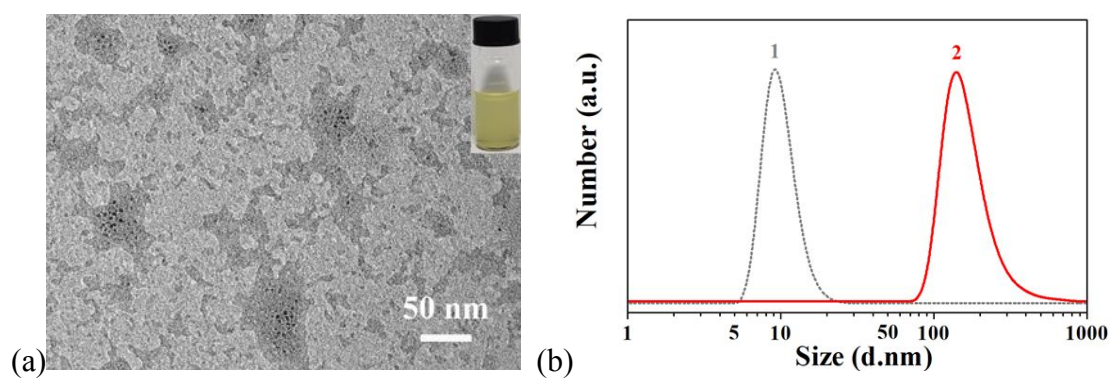

**Figure S1.** (a) TEM image of the system by cross-linking with DIP at 20 mg/mL; (b) DLS curves of  $\text{PI}_{10\text{k}}\text{-}b\text{-P4VP}_{15\text{k}}$  (1) and the crosslinked system (2).

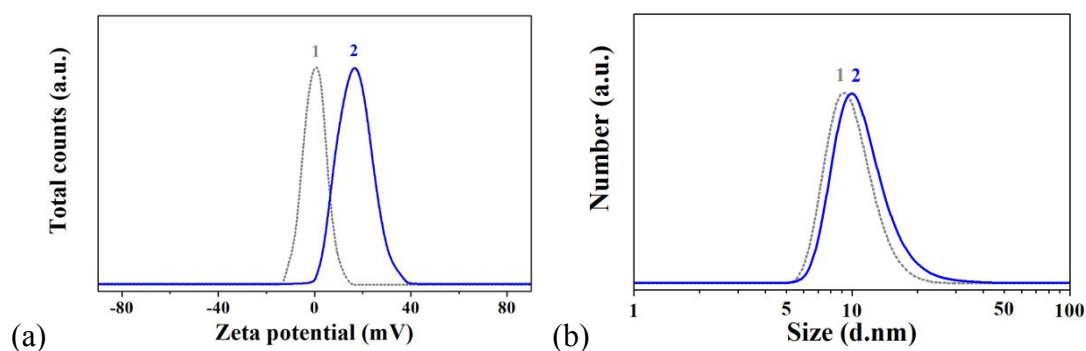

**Figure S2.** (a, b) Zeta potential and DLS curves of  $\text{PI}_{10\text{k}}\text{-}b\text{-P4VP}_{15\text{k}}$  (1) and  $\text{PI@NH}_2\cdot\text{HCl}\text{-}b\text{-P4VP}$  after the modification with MAHC (2).

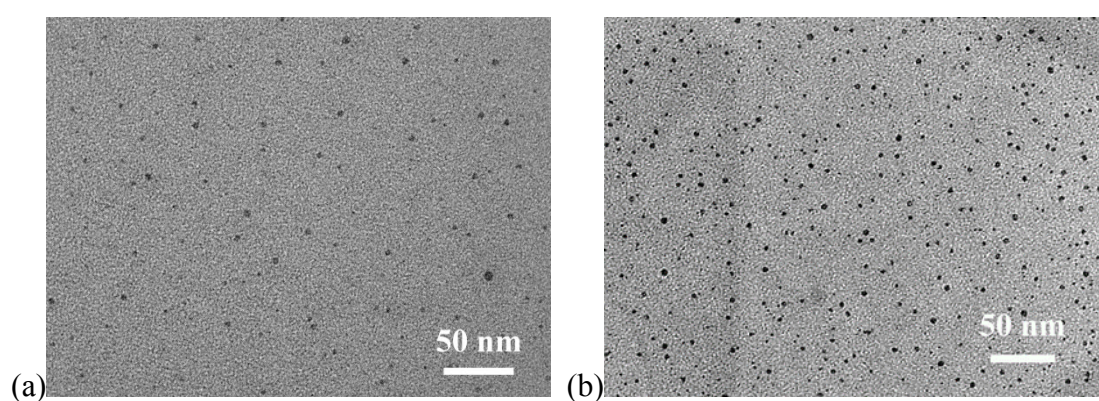

**Figure S3.** (a) TEM image of the as-synthesized  $\text{PI-cP4VP}$  without staining; (b) TEM image of  $\text{PI-cP4VP}$  after a preferential growth of Au.

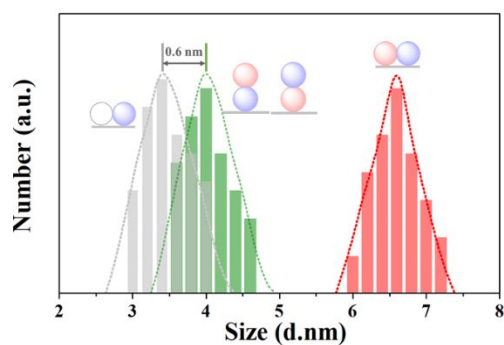

**Figure S4.** The size statistics by Image J of Au/*c*PI-*c*P4VP composite dimer after the hydrophobic modification with 1-octanethiol, inset the as-synthesized *c*PI-*c*P4VP (gray) without staining.

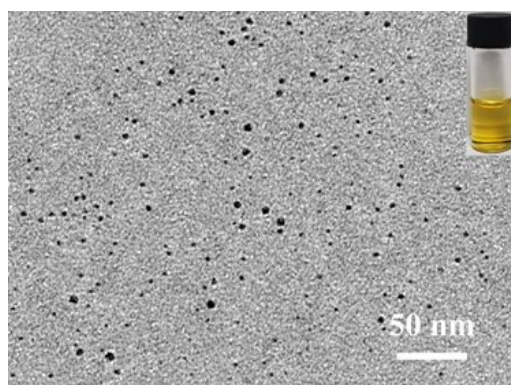

**Figure S5.** TEM image of the *c*PI-*c*P4VP dimer achieved by the electrostatic-mediated intramolecular cross-linking with DIP at 100 mg/mL.
